# Supplementary material for: Plasma Metabolic Profiling of Human Thyroid Nodules by Gas Chromatography-Mass Spectrometry (GC-MS)-Based Untargeted Metabolomics
Source: Front Cell Dev Biol. 2020 Jun 16;8:385. doi: 10.3389/fcell.2020.00385 (PMC7308550; doi:10.3389/fcell.2020.00385)
Supplement: Supplementary file 2 [file Data_Sheet_1.pdf]

## Supplementary Figures

**Supplementary Figure S1.** The GC–Q-MS total ion current (TIC) chromatograms of plasma from a healthy subject.

**Supplementary Figure S2.** The principal component analysis (PCA) scores plot obtained from GC-Q-MS data of all samples.

**Supplementary Figure S3.** Validation plot of a 100 permutation test for OPLS-DA model built for plasma samples among three groups.

**Supplementary Figure S4.** Validation plot of 100 permutation tests for OPLS-DA models built for plasma samples between two groups separately.

**Supplementary Figure S5.** Venn diagram analysis of discriminant metabolites in different groups, (blue) PTC vs Healthy, (yellow) MNG vs Healthy and (green) MNG vs PTC.

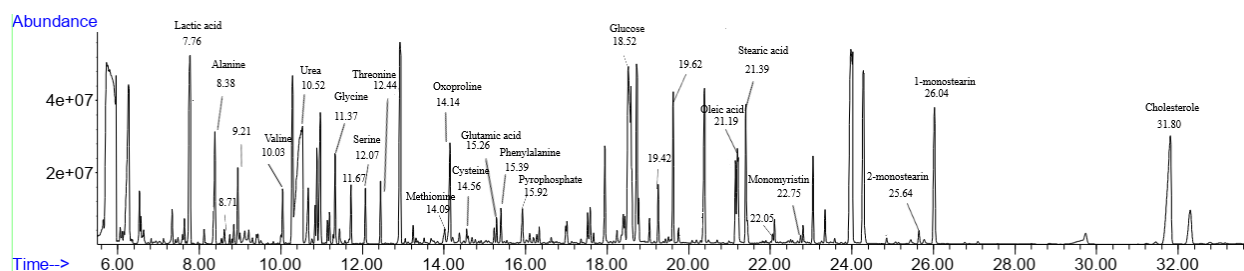

**Figure S1** The GC-Q-MS total ion current (TIC) chromatograms of plasma from a healthy subject

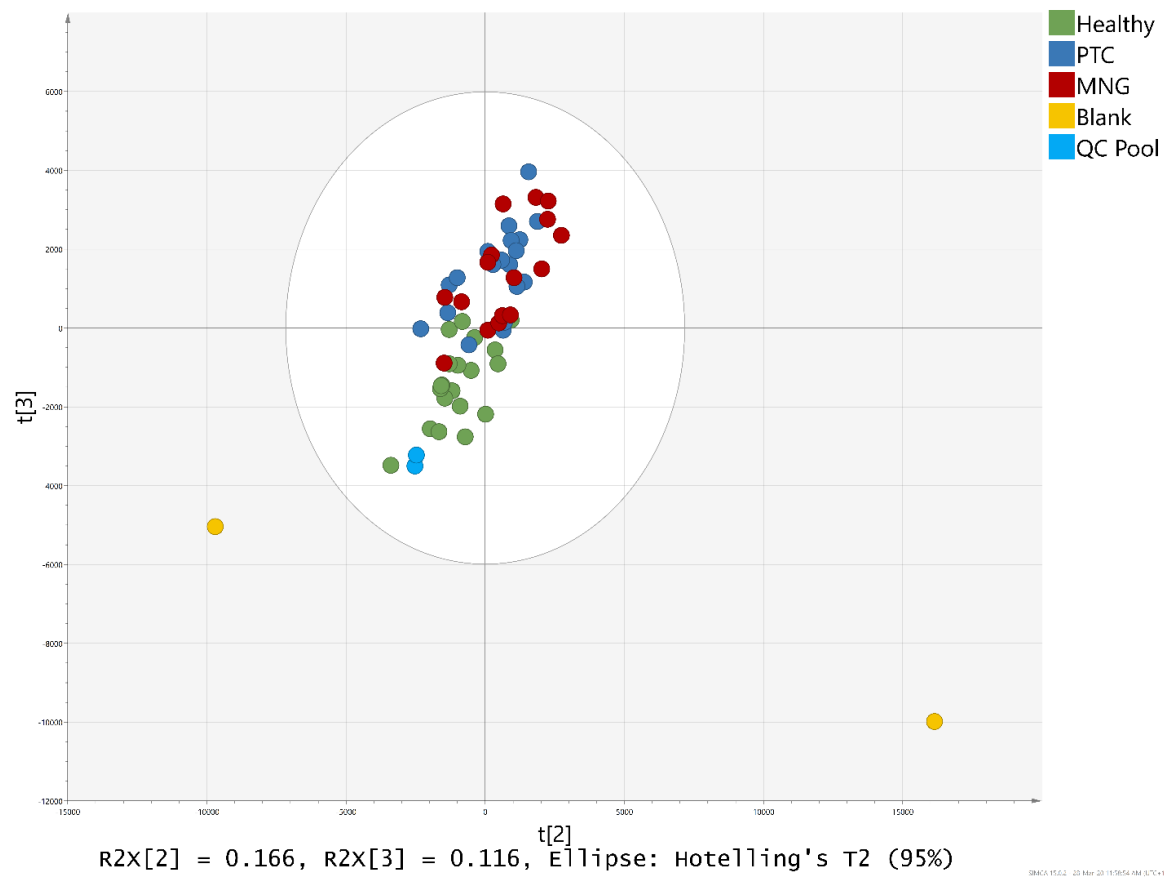

**Figure S2:** The principal component analysis (PCA) scores plot obtained from GC-Q-MS data of all samples. All quality control (QC) samples are found to cluster in the PCA plot.

PTC; papillary thyroid cancer, MNG; multi nodular goiter, QC; quality control

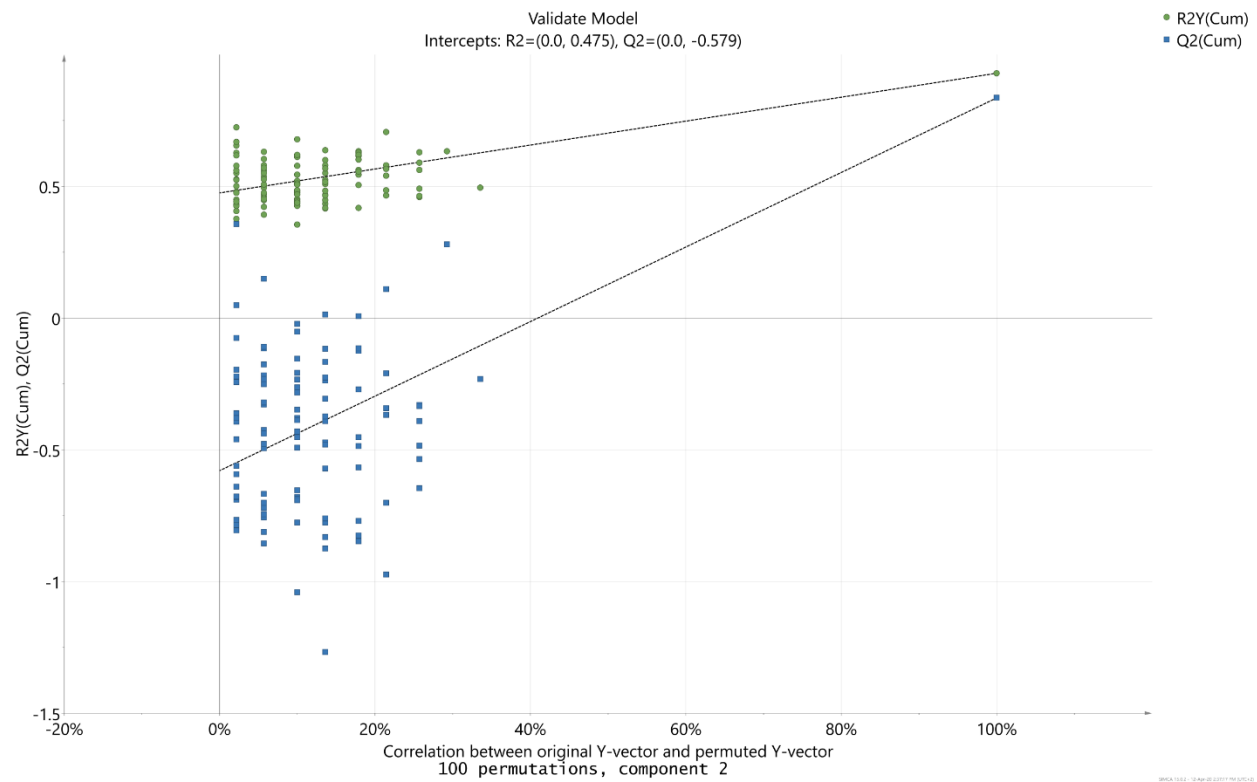

**Figure S3:** Validation plot of a 100 permutation test for OPLS-DA model built for plasma samples among three groups. Low value of R2Y and Q2-intercepts at 0.475 and -0.579 indicating a valid model.

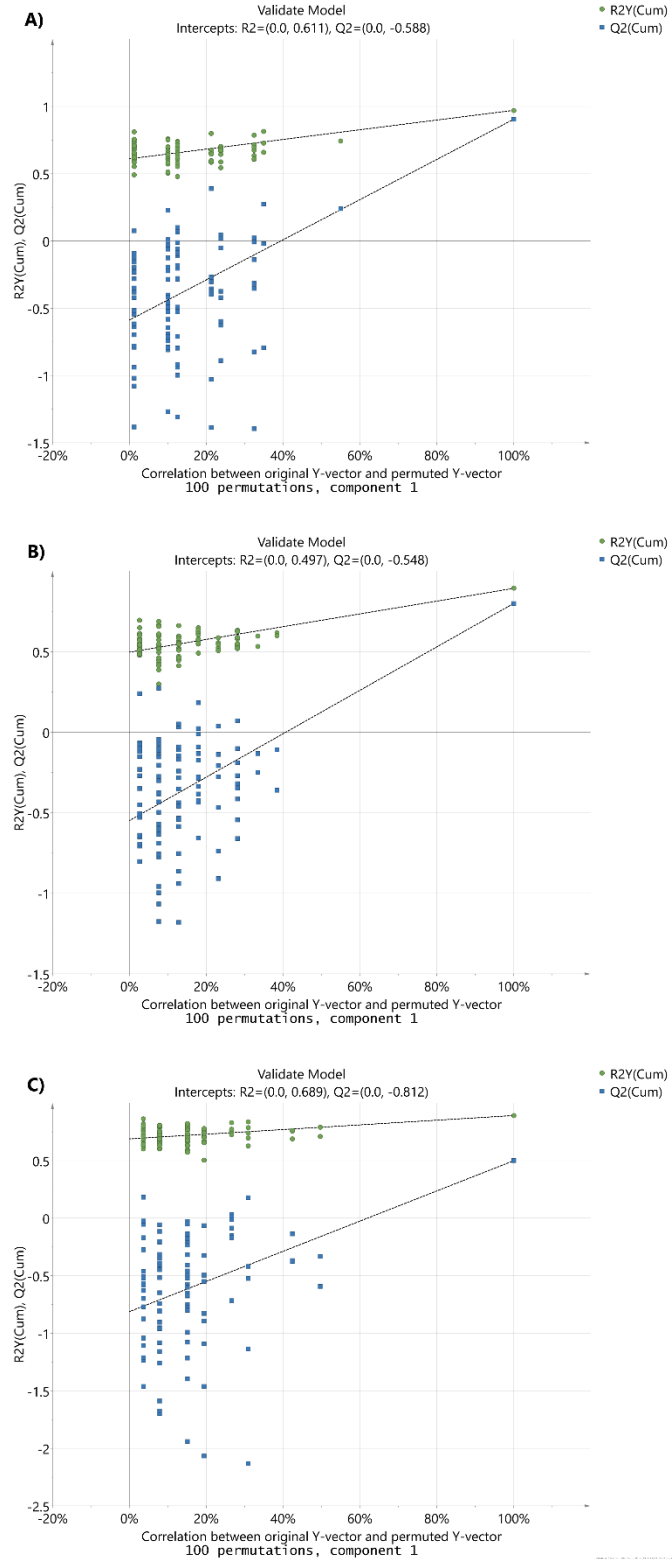

**Figure S4.** Validation plot of 100 permutation tests for OPLS-DA models built for plasma samples (A) MNG vs healthy, (B) PTC vs healthy and (C) PTC vs MNG. The 3 plots assure that the 3 models were well-preserved against overfitting.

MNG; multi nodular goiter, PTC; papillary thyroid cancer

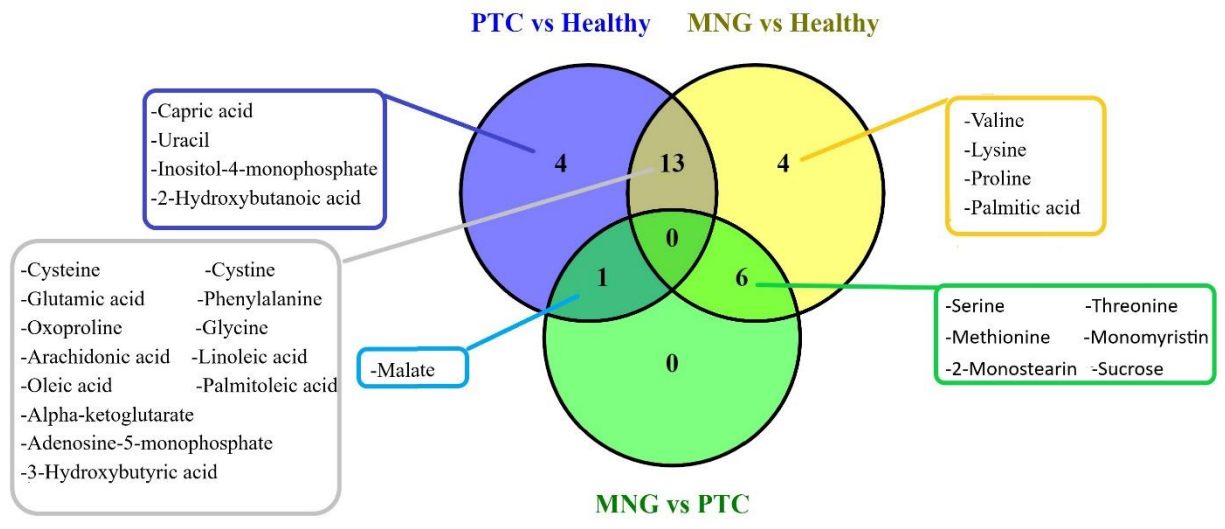

**Figure S5** Venn diagram analysis of discriminant metabolites in different groups, (blue) PTC vs Healthy, (yellow) MNG vs Healthy and (green) MNG vs PTC.

MNG; multi nodular goiter, PTC; papillary thyroid cancer
