# Supplementary material for: Plasma Metabolic Profiling of Human Thyroid Nodules by Gas Chromatography-Mass Spectrometry (GC-MS)-Based Untargeted Metabolomics
Source: PubMed Central journal article supplement (PMC7308550; doi:10.3389/fcell.2020.00385), 2020-06-16
Supplement: Table_1.pdf [file Table_1.pdf]

## Supplementary Tables

**Supplementary Table S1.** OPLS-DA models' parameters for plasma samples among three groups (healthy vs MNG vs PTC)

**Supplementary Table S2:** The mean values and standard deviations of the metabolite intensities

**Supplementary Table S3.** Significantly altered metabolites among three groups' classification (PTC, MNG, healthy) using one-way ANOVA analysis and Tukey's HSD test was used to analyses pairwise comparison (PTC vs H, MNG vs H and PTC vs MNG).

**Supplementary Table S4.** Parameters of OPLS-DA models for plasma samples between two groups separately.

**Supplementary Table S5.** Pathway analysis of PTC vs healthy

**Supplementary Table S6.** Pathway analysis of MNG vs healthy

**Table S1** OPLS-DA models' parameters for plasma samples among three groups (healthy vs MNG vs PTC)

|                                         |                                          | <b>OPLS-DA Model</b>                                     |
|-----------------------------------------|------------------------------------------|----------------------------------------------------------|
| <b>N</b> <sup>a</sup>                   |                                          | 2 ( <i>p</i> ) <sup>d</sup> +3 ( <i>O</i> ) <sup>e</sup> |
| <b>R<sup>2</sup>X(cum)</b> <sup>b</sup> |                                          | 0.496                                                    |
| <b>R<sup>2</sup>Y(cum)</b> <sup>b</sup> |                                          | 0.871                                                    |
| <b>Q<sup>2</sup>(cum)</b> <sup>c</sup>  |                                          | 0.617                                                    |
| <b>CV-ANOVA (p-value)</b>               |                                          | 1.51116e-11                                              |
| <b>Permutation test</b>                 | <b>R<sup>2</sup>Y (cum)</b> <sup>b</sup> | 0.475                                                    |
|                                         | <b>Q<sup>2</sup> (cum)</b> <sup>c</sup>  | -0.579                                                   |

a N: number of components.

b R<sup>2</sup>X (cum) and R<sup>2</sup>Y (cum) are the cumulative modeled variations in the X and Y matrix, respectively.

c Q<sup>2</sup>Y (cum) is the cumulative predicted variation in the Y matrix.

d P: Predictive component.

e O: Orthogonal component.

**Table S2** The mean values and standard deviations of the metabolite intensities

| <b>Metabolites</b>        | <b>Groups</b> | <b>Mean</b> | <b>Std. Deviation</b> |
|---------------------------|---------------|-------------|-----------------------|
| Cysteine                  | Healthy       | 4.1949      | 2.8633                |
|                           | PTC           | -1.6558     | 1.9685                |
|                           | MNG           | -3.2773     | 2.2225                |
| Cystine                   | Healthy       | 4.3614      | 3.4401                |
|                           | PTC           | -1.9444     | 2.8085                |
|                           | MNG           | -3.1428     | 1.9367                |
| glutamic acid             | Healthy       | -4.8885     | 2.6587                |
|                           | PTC           | 3.8403      | 4.0954                |
|                           | MNG           | 1.5502      | 3.9171                |
| sucrose                   | Healthy       | -2.3376     | 2.3760                |
|                           | PTC           | -1.5254     | 2.1933                |
|                           | MNG           | 4.7334      | 4.4750                |
| arachidonic acid          | Healthy       | -2.4001     | 1.5029                |
|                           | PTC           | 1.3583      | 2.2359                |
|                           | MNG           | 1.3871      | 1.9531                |
| oxoproline                | Healthy       | 3.8927      | 2.1028                |
|                           | PTC           | -1.9375     | 4.2150                |
|                           | MNG           | -2.5651     | 2.7358                |
| monomyristin              | Healthy       | -1.3864     | 2.0169                |
|                           | PTC           | -1.1241     | 2.3126                |
|                           | MNG           | 3.0679      | 2.1283                |
| glycine                   | Healthy       | 3.8349      | 2.9099                |
|                           | PTC           | -0.4748     | 4.2817                |
|                           | MNG           | -4.2298     | 3.8223                |
| alpha-ketoglutarate       | Healthy       | -2.9757     | 1.4479                |
|                           | PTC           | 1.5559      | 3.5257                |
|                           | MNG           | 1.8720      | 2.9710                |
| adenosine-5-monophosphate | Healthy       | -2.3716     | 0.5509                |
|                           | PTC           | 2.1179      | 3.4570                |
|                           | MNG           | 0.4495      | 2.1274                |
| linoleic acid             | Healthy       | -2.5976     | 2.2507                |
|                           | PTC           | 1.0798      | 2.7325                |
|                           | MNG           | 1.9648      | 2.7445                |
| phenylalanine             | Healthy       | 2.9867      | 2.4875                |
|                           | PTC           | -0.9121     | 3.6869                |
|                           | MNG           | -2.6503     | 2.9470                |
| Serine                    | Healthy       | 2.6334      | 2.2949                |
|                           | PTC           | 0.4657      | 4.0517                |
|                           | MNG           | -3.8447     | 3.7887                |
| Oleic acide               | Healthy       | -2.8351     | 3.2773                |
|                           | PTC           | 0.7064      | 2.8946                |
|                           | MNG           | 2.7051      | 2.8921                |

|                          |         |         |        |
|--------------------------|---------|---------|--------|
| 2-monostearin            | Healthy | -1.6479 | 2.0099 |
|                          | PTC     | -0.5044 | 2.7904 |
|                          | MNG     | 2.6589  | 2.2138 |
| threonine                | Healthy | 2.0397  | 2.6077 |
|                          | PTC     | 0.4895  | 3.3412 |
|                          | MNG     | -3.1309 | 3.1254 |
| palmitoleic acid         | Healthy | -2.6180 | 2.9602 |
|                          | PTC     | 1.2125  | 3.4169 |
|                          | MNG     | 1.8327  | 2.6867 |
| 3-hydroxybutyric acid    | Healthy | -4.4730 | 2.7934 |
|                          | PTC     | 2.9877  | 6.3368 |
|                          | MNG     | 2.0434  | 6.2446 |
| methionine               | Healthy | 1.3385  | 1.9454 |
|                          | PTC     | 0.2949  | 2.1399 |
|                          | MNG     | -2.0232 | 2.8333 |
| Valine                   | Healthy | 2.4230  | 2.8867 |
|                          | PTC     | -0.6424 | 3.9591 |
|                          | MNG     | -2.2658 | 4.1722 |
| uracil                   | Healthy | -1.5409 | 2.0402 |
|                          | PTC     | 1.5798  | 3.1369 |
|                          | MNG     | 0.0501  | 3.0826 |
| capric acid              | Healthy | -2.2106 | 0.8928 |
|                          | PTC     | 2.1067  | 5.9762 |
|                          | MNG     | 0.2615  | 3.5751 |
| lysine                   | Healthy | 2.0848  | 2.9559 |
|                          | PTC     | -0.5757 | 4.9299 |
|                          | MNG     | -1.9223 | 3.2686 |
| palmitic acid            | Healthy | -1.3602 | 2.7557 |
|                          | PTC     | 0.0612  | 2.2555 |
|                          | MNG     | 1.6277  | 3.3341 |
| malate                   | Healthy | -0.8027 | 1.4536 |
|                          | PTC     | 1.2912  | 2.9605 |
|                          | MNG     | -0.5299 | 1.8623 |
| 2-hydroxybutanoic acid   | Healthy | -1.9873 | 2.8771 |
|                          | PTC     | 1.7662  | 3.7893 |
|                          | MNG     | 0.3868  | 4.6621 |
| inositol-4-monophosphate | Healthy | 1.1599  | 2.1507 |
|                          | PTC     | -1.1133 | 2.3250 |
|                          | MNG     | -0.1279 | 2.6527 |
| proline                  | Healthy | 2.7777  | 4.7451 |
|                          | PTC     | -0.7138 | 6.1489 |
|                          | MNG     | -2.6245 | 6.3416 |

**Table S3** Significantly altered metabolites among three groups' classification (PTC, MNG, healthy) using one-way ANOVA analysis and Tukey's HSD test was used to analyses pairwise comparison (PTC vs. H, MNG vs. H and PTC vs. MNG).

| Metabolites               | Subchemical classes | RT(min) | VIP  | One-way ANOVA        |          | Multiple comparisons (Tukey HSD) |                      |                      |
|---------------------------|---------------------|---------|------|----------------------|----------|----------------------------------|----------------------|----------------------|
|                           |                     |         |      | P.value <sup>a</sup> | FDR      | PTC vs H                         | MNG vs H             | PTC vs MNG           |
|                           |                     |         |      |                      |          | P.value <sup>a</sup>             | P.value <sup>a</sup> | P.value <sup>a</sup> |
| cysteine                  | Amino acid          | 14.41   | 1.32 | 7.80E-13             | 4.68E-11 | 6.6851E-9                        | 5.1051E-9            | 0.12                 |
| cystine                   | Amino acid          | 22.057  | 1.26 | 8.25E-11             | 2.47E-09 | 2.6352E-8                        | 5.7718E-9            | 0.43                 |
| glutamic acid             | Amino acid          | 15.262  | 1.49 | 1.32E-09             | 2.64E-08 | 6.6679E-9                        | 0.0000006            | 0.15                 |
| phenylalanine             | Amino acid          | 15.395  | 1.19 | 3.43E-06             | 1.62E-05 | 0.001                            | 0.000004             | 0.22                 |
| serine                    | Amino acid          | 12.072  | 1.34 | 3.52E-06             | 1.62E-05 | 0.12                             | 0.000002             | 0.001                |
| oxoproline                | Amino acid          | 14.143  | 1.26 | 3.79E-08             | 3.79E-07 | 0.000001                         | 3.8688E-7            | 0.82                 |
| glycine                   | Amino acid          | 11.378  | 1.3  | 1.65E-07             | 1.24E-06 | 0.002                            | 9.5189E-8            | 0.12                 |
| threonine                 | Amino acid          | 12.44   | 1.35 | 2.11E-05             | 7.89E-05 | 0.25                             | 0.000015             | 0.003                |
| methionine                | Amino acid          | 14.091  | 1.19 | 0.000255             | 0.000804 | 0.34                             | 0.000180             | 0.012                |
| valine                    | Amino acid          | 10.039  | 0.99 | 0.00119              | 0.003571 | 0.32                             | 0.001                | 0.4                  |
| lysine                    | Amino acid          | 18.6    | 0.89 | 0.008837             | 0.021997 | 0.87                             | 0.008                | 0.55                 |
| Proline                   | Amino acid          | 11.191  | 0.92 | 0.020997             | 0.041994 | 0.14                             | 0.019                | 0.59                 |
| arachidonic acid          | Lipid               | 22.493  | 1.25 | 2.79E-08             | 3.35E-07 | 3.5517E-7                        | 8.1325E-7            | 0.9                  |
| linoleic acid             | Lipid               | 21.15   | 1.11 | 2.72E-06             | 1.49E-05 | 0.000127                         | 0.000007             | 0.57                 |
| oleic acid                | Lipid               | 21.192  | 1.15 | 5.08E-06             | 2.18E-05 | 0.002                            | 0.000004             | 0.13                 |
| palmitic acid             | Lipid               | 19.626  | 1.04 | 0.009246             | 0.021997 | 0.25                             | 0.006                | 0.23                 |
| palmitoleic acid          | Lipid               | 19.427  | 1.01 | 6.25E-05             | 0.000221 | 0.001                            | 0.000189             | 0.82                 |
| capric acid               | Lipid               | 13.204  | 0.97 | 0.006251             | 0.017049 | 0.004                            | 0.17                 | 0.37                 |
| monomyristin              | Glycerolipid        | 22.748  | 1.49 | 7.23E-08             | 6.20E-07 | 0.9                              | 3.2261E-7            | 0.000002             |
| 2-monostearin             | Glycerolipid        | 25.647  | 1.31 | 5.52E-06             | 2.21E-05 | 0.294                            | 0.000004             | 0.001                |
| alpha-ketoglutarate       | Keto acid           | 14.683  | 1.12 | 9.45E-07             | 6.30E-06 | 0.000013                         | 0.000009             | 0.93                 |
| malate                    | dicarboxylic acid   | 13.731  | 1.3  | 0.0094734            | 0.021997 | 0.012                            | 0.92                 | 0.046                |
| adenosine-5-monophosphate | nucleotide          | 30.576  | 1.44 | 1.09E-06             | 6.52E-06 | 7.0007E-7                        | 0.002                | 0.10                 |
| uracil                    | nucleotide          | 11.68   | 1.07 | 0.003875             | 0.011072 | 0.003                            | 0.21                 | 0.24                 |
| inositol-4-monophosphate  | Organooxygen        | 23.268  | 1.01 | 0.01529              | 0.032764 | 0.011                            | 0.24                 | 0.8                  |
| 3-hydroxybutyric acid     | Beta hydroxy acids  | 9.219   | 1.02 | 8.03E-05             | 0.000268 | 0.000157                         | 0.002                | 0.85                 |
| 2-hydroxybutanoic acid    | Alpha hydroxy acids | 8.716   | 0.96 | 0.010952             | 0.024338 | 0.009                            | 0.15                 | 0.53                 |
| Sucrose                   | Carbohydrate        | 25.148  | 1.6  | 9.39E-09             | 1.41E-07 | 0.6                              | 3.1836E-8            | 6.1414E-7            |

ANOVA analysis of variance, MNG multinodular goiter, PTC papillary thyroid carcinoma, FDR false discovery rate, RT retention time

<sup>a</sup> P-values are from the one-way ANOVA and the Tukey post hoc test. P-value of < 0.05 was considered statistically significant

**Table S4** Parameters of OPLS-DA models for plasma samples between two groups separately.

|                                        |                                        | <u>OPLS-DA Models</u>                                    |                                                          |                                                          |
|----------------------------------------|----------------------------------------|----------------------------------------------------------|----------------------------------------------------------|----------------------------------------------------------|
|                                        |                                        | Healthy vs MNG                                           | Healthy vs PTC                                           | PTC vs MNG                                               |
| <b>N<sup>a</sup></b>                   |                                        | 1 ( <i>P</i> ) <sup>d</sup> +2 ( <i>O</i> ) <sup>e</sup> | 1 ( <i>P</i> ) <sup>d</sup> +1 ( <i>O</i> ) <sup>e</sup> | 1 ( <i>P</i> ) <sup>d</sup> +2 ( <i>O</i> ) <sup>e</sup> |
| <b>R<sup>2</sup>X(cum)<sup>b</sup></b> |                                        | 0.486                                                    | 0.314                                                    | 0.357                                                    |
| <b>R<sup>2</sup>Y(cum)<sup>b</sup></b> |                                        | 0.971                                                    | 0.893                                                    | 0.892                                                    |
| <b>Q<sup>2</sup>(cum)<sup>c</sup></b>  |                                        | 0.905                                                    | 0.799                                                    | 0.499                                                    |
| <b>CV-ANOVA (p-values)</b>             |                                        | 1.6687e-13                                               | 2.03403e-11                                              | 0.002                                                    |
| <b>Permutation Test</b>                | <b>R<sup>2</sup>Y(cum)<sup>b</sup></b> | 0.611                                                    | 0.497                                                    | 0.689                                                    |
|                                        | <b>Q<sup>2</sup>(cum)<sup>c</sup></b>  | -0.588                                                   | -0.548                                                   | -0.812                                                   |

a N: number of components.

b R<sup>2</sup>X (cum) and R<sup>2</sup>Y (cum) are the cumulative modeled variations in the X and Y matrix, respectively.

c Q<sup>2</sup>Y (cum) is the cumulative predicted variation in the Y matrix.

d P: Predictive component.

e O: Orthogonal component.

**Table S5** Pathway analysis of PTC against healthy

| Metabolic Pathways                                  | Total Cmpd <sup>a</sup> | Hits <sup>b</sup> | Raw p <sup>c</sup> | FDR <sup>d</sup> | Impact  |
|-----------------------------------------------------|-------------------------|-------------------|--------------------|------------------|---------|
| Glutathione metabolism                              | 28                      | 5                 | 1.12E-13           | 5.83E-12         | 0.11891 |
| Butanoate metabolism                                | 15                      | 4                 | 1.76E-11           | 3.32E-10         | 0       |
| Cysteine and methionine metabolism                  | 33                      | 4                 | 2.70E-10           | 3.52E-09         | 0.22222 |
| Histidine metabolism                                | 16                      | 1                 | 9.57E-10           | 9.96E-09         | 0       |
| Glyoxylate and dicarboxylate metabolism             | 32                      | 8                 | 3.07E-09           | 2.66E-08         | 0.33864 |
| D-Glutamine and D-glutamate metabolism              | 6                       | 3                 | 1.19E-08           | 7.98E-08         | 0.5     |
| Taurine and hypotaurine metabolism                  | 8                       | 1                 | 1.43E-08           | 7.98E-08         | 0       |
| Thiamine metabolism                                 | 7                       | 1                 | 1.43E-08           | 7.98E-08         | 0       |
| Aminoacyl-tRNA biosynthesis                         | 48                      | 15                | 1.53E-08           | 7.98E-08         | 0.16667 |
| Pantothenate and CoA biosynthesis                   | 19                      | 3                 | 1.70E-08           | 8.01E-08         | 0       |
| Arginine biosynthesis                               | 14                      | 5                 | 4.35E-08           | 1.88E-07         | 0.17766 |
| Arachidonic acid metabolism                         | 36                      | 1                 | 1.36E-07           | 5.44E-07         | 0.3135  |
| Alanine, aspartate and glutamate metabolism         | 28                      | 7                 | 2.61E-07           | 9.69E-07         | 0.36138 |
| Nitrogen metabolism                                 | 6                       | 2                 | 4.30E-07           | 1.49E-06         | 0       |
| Arginine and proline metabolism                     | 38                      | 3                 | 6.52E-07           | 2.12E-06         | 0.27443 |
| Biosynthesis of unsaturated fatty acids             | 36                      | 5                 | 5.71E-06           | 1.75E-05         | 0       |
| Glycine, serine and threonine metabolism            | 33                      | 5                 | 8.54E-06           | 2.47E-05         | 0.48704 |
| Synthesis and degradation of ketone bodies          | 5                       | 1                 | 1.69E-05           | 4.54E-05         | 0       |
| Linoleic acid metabolism                            | 5                       | 1                 | 1.75E-05           | 4.54E-05         | 1       |
| beta-Alanine metabolism                             | 21                      | 1                 | 0.000621           | 0.001537         | 0       |
| Fatty acid biosynthesis                             | 47                      | 2                 | 0.000868           | 0.002051         | 0.01473 |
| Primary bile acid biosynthesis                      | 46                      | 2                 | 0.001045           | 0.002362         | 0.05823 |
| Purine metabolism                                   | 65                      | 4                 | 0.001985           | 0.004301         | 0.08068 |
| Citrate cycle (TCA cycle)                           | 20                      | 5                 | 0.00278            | 0.005783         | 0.2556  |
| Phenylalanine, tyrosine and tryptophan biosynthesis | 4                       | 2                 | 0.004155           | 0.008003         | 1       |
| Phenylalanine metabolism                            | 10                      | 2                 | 0.004155           | 0.008003         | 0.35714 |
| Tryptophan metabolism                               | 41                      | 1                 | 0.011024           | 0.020473         | 0.14305 |
| Pyrimidine metabolism                               | 39                      | 2                 | 0.01539            | 0.02674          | 0.0743  |
| Fatty acid elongation                               | 39                      | 1                 | 0.015941           | 0.02674          | 0       |
| Fatty acid degradation                              | 39                      | 1                 | 0.015941           | 0.02674          | 0       |
| Propanoate metabolism                               | 23                      | 2                 | 0.024061           | 0.0391           | 0       |
| Sphingolipid metabolism                             | 21                      | 1                 | 0.061399           | 0.092003         | 0       |
| Lysine degradation                                  | 25                      | 1                 | 0.061925           | 0.092003         | 0       |
| Biotin metabolism                                   | 10                      | 1                 | 0.061925           | 0.092003         | 0       |
| Valine, leucine and isoleucine biosynthesis         | 8                       | 3                 | 0.068438           | 0.098854         | 0       |
| Ubiquinone and other terpenoid-quinone biosynthesis | 9                       | 1                 | 0.072727           | 0.10221          | 0       |
| Valine, leucine and isoleucine degradation          | 40                      | 2                 | 0.076893           | 0.10307          | 0       |

|                                       |    |   |          |         |         |
|---------------------------------------|----|---|----------|---------|---------|
| Pyruvate metabolism                   | 22 | 3 | 0.078271 | 0.10307 | 0.0311  |
| Tyrosine metabolism                   | 42 | 2 | 0.079283 | 0.10307 | 0.16435 |
| Steroid biosynthesis                  | 42 | 1 | 0.16768  | 0.20761 | 0.0282  |
| Steroid hormone biosynthesis          | 85 | 1 | 0.16768  | 0.20761 | 0.00528 |
| Glycolysis / Gluconeogenesis          | 26 | 1 | 0.34957  | 0.42274 | 0       |
| Selenocompound metabolism             | 20 | 1 | 0.43252  | 0.51116 | 0       |
| Glycerolipid metabolism               | 16 | 2 | 0.53647  | 0.61992 | 0.33022 |
| Starch and sucrose metabolism         | 18 | 2 | 0.66846  | 0.74201 | 0.47093 |
| Inositol phosphate metabolism         | 30 | 1 | 0.6992   | 0.74201 | 0.12939 |
| Phosphatidylinositol signaling system | 28 | 1 | 0.6992   | 0.74201 | 0.03736 |
| Ascorbate and aldarate metabolism     | 8  | 1 | 0.6992   | 0.74201 | 0       |
| Galactose metabolism                  | 27 | 5 | 0.77616  | 0.79724 | 0.07387 |
| Pentose phosphate pathway             | 22 | 1 | 0.78191  | 0.79724 | 0       |

<sup>a</sup>Total Cmpd: total number of compounds in the pathway

<sup>b</sup>Hit: actually matched number from the data

<sup>c</sup>Raw p : p value calculated from the enrichment analysis

<sup>d</sup>FDR: p value adjusted using False Discovery Rate  
PTC, papillary thyroid cancer; FDR, false discovery rate



**Table S6** Pathway analysis of MNG against healthy

| <b>Metabolic Pathways</b>                           | <b>Total Cmpd<sup>a</sup></b> | <b>Hits<sup>b</sup></b> | <b>Raw p<sup>c</sup></b> | <b>FDR<sup>d</sup></b> | <b>Impact</b> |
|-----------------------------------------------------|-------------------------------|-------------------------|--------------------------|------------------------|---------------|
| Glutathione metabolism                              | 28                            | 5                       | 2.57E-15                 | 1.34E-13               | 0.11891       |
| Glyoxylate and dicarboxylate metabolism             | 32                            | 8                       | 4.67E-13                 | 1.21E-11               | 0.33864       |
| Cysteine and methionine metabolism                  | 33                            | 4                       | 1.77E-12                 | 2.44E-11               | 0.22222       |
| Aminoacyl-tRNA biosynthesis                         | 48                            | 15                      | 1.88E-12                 | 2.44E-11               | 0.16667       |
| Glycine, serine and threonine metabolism            | 33                            | 5                       | 1.45E-10                 | 1.26E-09               | 0.48704       |
| Taurine and hypotaurine metabolism                  | 8                             | 1                       | 1.80E-09                 | 1.17E-08               | 0             |
| Thiamine metabolism                                 | 7                             | 1                       | 1.80E-09                 | 1.17E-08               | 0             |
| Arginine biosynthesis                               | 14                            | 5                       | 8.04E-09                 | 4.64E-08               | 0.17766       |
| Arachidonic acid metabolism                         | 36                            | 1                       | 9.19E-09                 | 4.78E-08               | 0.3135        |
| Pantothenate and CoA biosynthesis                   | 19                            | 3                       | 2.56E-08                 | 1.21E-07               | 0             |
| Butanoate metabolism                                | 15                            | 4                       | 2.98E-08                 | 1.29E-07               | 0             |
| D-Glutamine and D-glutamate metabolism              | 6                             | 3                       | 3.45E-08                 | 1.38E-07               | 0.5           |
| Biosynthesis of unsaturated fatty acids             | 36                            | 5                       | 1.03E-07                 | 3.81E-07               | 0             |
| Histidine metabolism                                | 16                            | 1                       | 1.11E-07                 | 3.85E-07               | 0             |
| Linoleic acid metabolism                            | 5                             | 1                       | 4.44E-07                 | 1.44E-06               | 1             |
| Primary bile acid biosynthesis                      | 46                            | 2                       | 5.05E-07                 | 1.49E-06               | 0.05823       |
| Arginine and proline metabolism                     | 38                            | 3                       | 5.15E-07                 | 1.49E-06               | 0.27443       |
| Sphingolipid metabolism                             | 21                            | 1                       | 1.08E-06                 | 2.95E-06               | 0             |
| Nitrogen metabolism                                 | 6                             | 2                       | 3.71E-06                 | 9.64E-06               | 0             |
| Fatty acid biosynthesis                             | 47                            | 2                       | 2.04E-05                 | 5.04E-05               | 0.01473       |
| Alanine, aspartate and glutamate metabolism         | 28                            | 7                       | 5.91E-05                 | 0.00014                | 0.36138       |
| Valine, leucine and isoleucine biosynthesis         | 8                             | 3                       | 8.37E-05                 | 0.000189               | 0             |
| Synthesis and degradation of ketone bodies          | 5                             | 1                       | 8.95E-05                 | 0.000194               | 0             |
| Galactose metabolism                                | 27                            | 5                       | 9.52E-05                 | 0.000198               | 0.07387       |
| Starch and sucrose metabolism                       | 18                            | 2                       | 0.000108                 | 0.000217               | 0.47093       |
| Phenylalanine, tyrosine and tryptophan biosynthesis | 4                             | 2                       | 0.000172                 | 0.000304               | 1             |
| Phenylalanine metabolism                            | 10                            | 2                       | 0.000172                 | 0.000304               | 0.35714       |
| Fatty acid elongation                               | 39                            | 1                       | 0.000175                 | 0.000304               | 0             |
| Fatty acid degradation                              | 39                            | 1                       | 0.000175                 | 0.000304               | 0             |
| Citrate cycle (TCA cycle)                           | 20                            | 5                       | 0.002926                 | 0.004909               | 0.2556        |
| Valine, leucine and isoleucine degradation          | 40                            | 2                       | 0.003029                 | 0.004916               | 0             |
| Lysine degradation                                  | 25                            | 1                       | 0.003214                 | 0.004916               | 0             |
| Biotin metabolism                                   | 10                            | 1                       | 0.003214                 | 0.004916               | 0             |
| Glycerolipid metabolism                             | 16                            | 2                       | 0.012611                 | 0.018736               | 0.33022       |
| Tyrosine metabolism                                 | 42                            | 2                       | 0.039147                 | 0.056545               | 0.16435       |
| Purine metabolism                                   | 65                            | 4                       | 0.052541                 | 0.073841               | 0.08068       |
| Tryptophan metabolism                               | 41                            | 1                       | 0.056911                 | 0.077835               | 0.14305       |
| Ubiquinone and other terpenoid-quinone biosynthesis | 9                             | 1                       | 0.058376                 | 0.077835               | 0             |

|                                                 |    |   |          |          |         |
|-------------------------------------------------|----|---|----------|----------|---------|
| beta-Alanine metabolism                         | 21 | 1 | 0.061634 | 0.080124 | 0       |
| Propanoate metabolism                           | 23 | 2 | 0.24233  | 0.30735  | 0       |
| Pyruvate metabolism                             | 22 | 3 | 0.25888  | 0.32052  | 0.0311  |
| Pyrimidine metabolism                           | 39 | 2 | 0.42549  | 0.50286  | 0.0743  |
| Selenocompound metabolism                       | 20 | 1 | 0.4255   | 0.50286  | 0       |
| Neomycin, kanamycin and gentamicin biosynthesis | 2  | 1 | 0.46684  | 0.50716  | 0       |
| Steroid biosynthesis                            | 42 | 1 | 0.47266  | 0.50716  | 0.0282  |
| Steroid hormone biosynthesis                    | 85 | 1 | 0.47266  | 0.50716  | 0.00528 |
| Inositol phosphate metabolism                   | 30 | 1 | 0.48766  | 0.50716  | 0.12939 |
| Phosphatidylinositol signaling system           | 28 | 1 | 0.48766  | 0.50716  | 0.03736 |
| Ascorbate and aldarate metabolism               | 8  | 1 | 0.48766  | 0.50716  | 0       |
| Glycolysis / Gluconeogenesis                    | 26 | 1 | 0.55196  | 0.56279  | 0       |
| Pentose phosphate pathway                       | 22 | 1 | 0.67679  | 0.67679  | 0       |

<sup>a</sup>Total Cmpd: total number of compounds in the pathway,

<sup>b</sup>Hit: actually matched number from the data,

<sup>c</sup>Raw p : p value calculated from the enrichment analysis,

<sup>d</sup>FDR: p value adjusted using False Discovery Rate

MNG, multinodular goiter; FDR, false discovery rate
